# Supplementary material
Source: PubMed Central journal article supplement (PMC4935637)
Supplement: NIHMS749027-supplement.pdf [file NIHMS749027-supplement.pdf]

**Interactions between Anandamide & Corticotropin-Releasing Hormone Signaling  
Modulate Human Amygdala Function & Risk for Anxiety Disorders: An Imaging  
Genetics Strategy for Modeling Molecular Interactions**

***Supplemental Information***

**Table S1. DSM-IV diagnosis.**

|                     | <i>n</i> |
|---------------------|----------|
| Bipolar             | 11       |
| Generalized Anxiety | 12       |
| Panic               | 6        |
| Agoraphobia         | 10       |
| OCD                 | 6        |
| Social Anxiety      | 6        |
| Alcohol Abuse       | 44       |
| Alcohol Dependence  | 29       |
| Cannabis Abuse      | 14       |
| Cannabis Dependence | 8        |

**Table S2. Self-reported ethnicity.**

|        | <i>n</i> |
|--------|----------|
| White  | 311      |
| Black  | 73       |
| Asian  | 173      |
| Latino | 40       |
| Multi  | 2        |
| Other  | 62       |

**Table S3. CRHR1 FAAH Interaction Predicting Basolateral Amygdala Habituation**

| Variable             | Left Basolateral Amygdala |               | Right Basolateral Amygdala |               |
|----------------------|---------------------------|---------------|----------------------------|---------------|
|                      | $\beta$                   | $p$           | $\beta$                    | $p$           |
| Sex                  | -0.0297                   | 0.2054        | -0.0057                    | 0.7754        |
| PC1                  | <b>0.9375</b>             | <b>0.0334</b> | 0.6662                     | 0.0741        |
| PC2                  | -0.2296                   | 0.6654        | 0.1360                     | 0.7623        |
| PC3                  | -0.2371                   | 0.5240        | -0.2726                    | 0.3872        |
| PC4                  | -0.3656                   | 0.3141        | -0.4343                    | 0.1581        |
| PC5                  | -0.0940                   | 0.8086        | -0.0502                    | 0.8785        |
| FAAH rs324420        | -0.0009                   | 0.9691        | 0.0021                     | 0.9184        |
| CRHR1 rs110402       | 0.0446                    | 0.1408        | 0.0341                     | 0.1832        |
| Sex x FAAH rs324420  | -0.0801                   | 0.0993        | <b>-0.0816</b>             | <b>0.0474</b> |
| Sex x CRHR1 rs110402 | -0.0459                   | 0.3430        | -0.0509                    | 0.2146        |
| PC1 x FAAH rs324420  | -0.9016                   | 0.2650        | -1.2458                    | 0.0692        |
| PC1 x CRHR1 rs110402 | 1.3255                    | 0.0964        | 1.0682                     | 0.1136        |
| PC2 x FAAH rs324420  | 0.1552                    | 0.8103        | -0.4624                    | 0.3986        |
| PC2 x CRHR1 rs110402 | 0.9763                    | 0.4620        | -0.1352                    | 0.9043        |
| PC3 x FAAH rs324420  | -1.3734                   | 0.0709        | -0.8278                    | 0.1984        |
| PC3 x CRHR1 rs110402 | 0.4206                    | 0.5407        | -0.0213                    | 0.9709        |
| PC4 x FAAH rs324420  | -0.6608                   | 0.3297        | -0.5987                    | 0.2972        |
| PC4 x CRHR1 rs110402 | -0.4158                   | 0.5728        | 0.1252                     | 0.8411        |
| PC5 x FAAH rs324420  | 0.0137                    | 0.9843        | 0.2030                     | 0.7301        |
| PC5 x CRHR1 rs110402 | <b>-1.6884</b>            | <b>0.0143</b> | <b>-1.3573</b>             | <b>0.0201</b> |
| CRHR1 x FAAH         | <b>-0.1667</b>            | <b>0.0067</b> | <b>-0.1418</b>             | <b>0.0065</b> |

Standardized beta and  $p$  values are presented for each predictor.

Any predictor significant at  $p < 0.05$  is bolded.

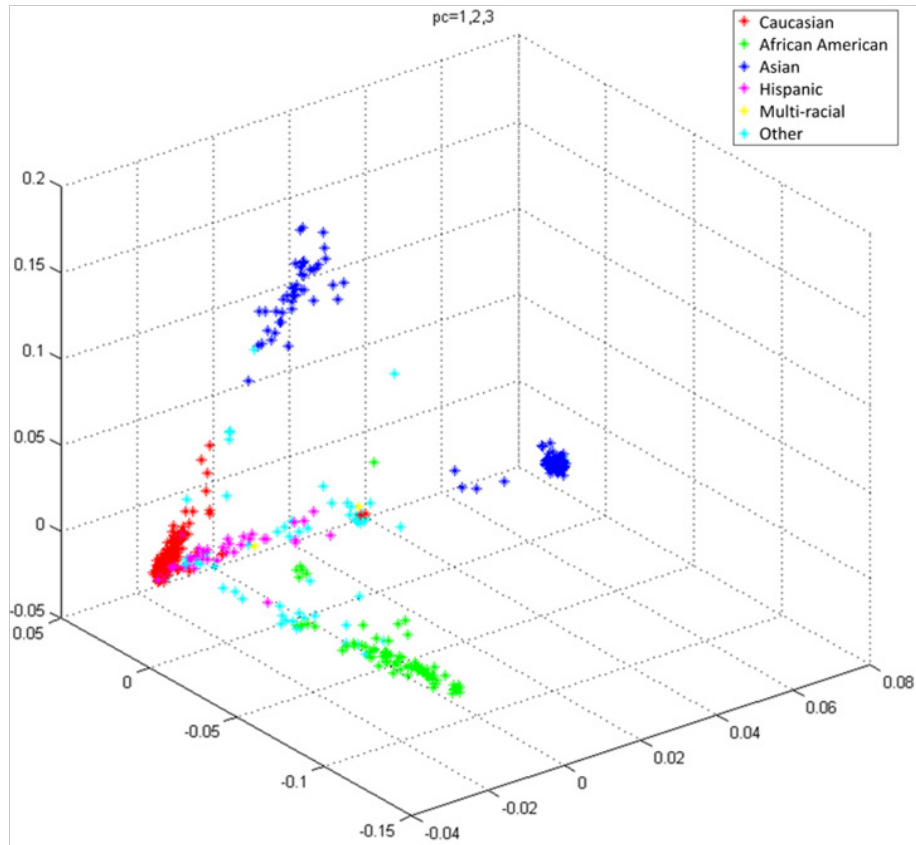

**Figure S1. Principal components and self-reported ancestry.** Plot showing the top 3 principal components account for the various groups within the population.

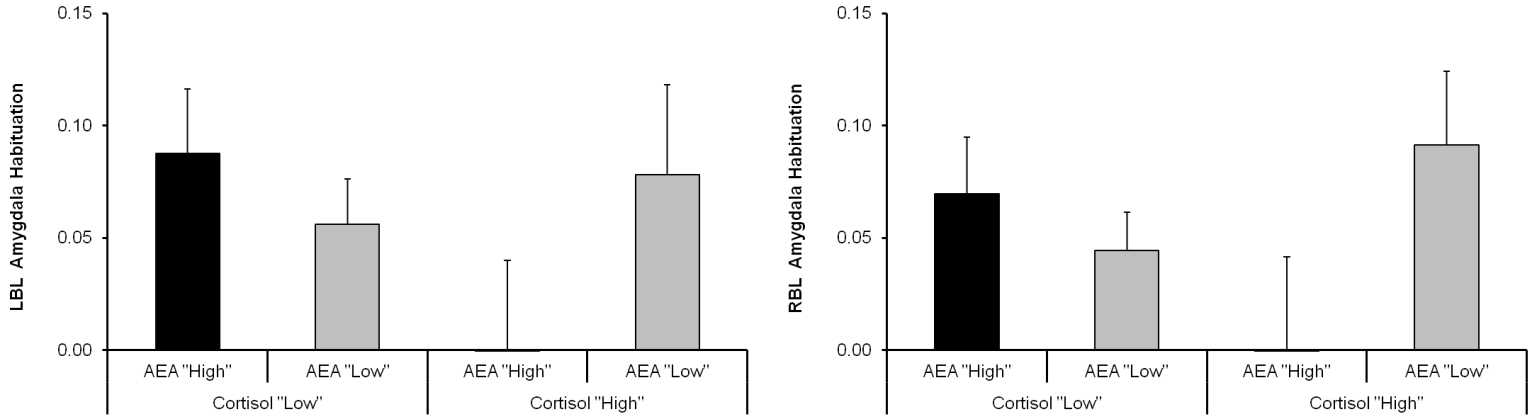

**Figure S2.** Genetic polymorphisms affecting anandamide and CRHR1 signaling predict basolateral amygdala function in European/European Americans. Post-hoc analyses demonstrated no significant differences between groups. Error bars indicate SEM.

### Supplemental Analyses

We completed additional analyses evaluating left basolateral (BL) amygdala habituation and alcohol use disorder, as well as diagnosis of any DSM-IV disorder. There were no significant associations between left BL amygdala habituation and alcohol use disorder:  $t_{(661)} = 1.531$ ,  $p = .126$ , or diagnosis of any DSM-IV disorder:  $t_{(661)} = .227$ ,  $p = .82$ . Additional specific disorder analyses are not possible in this sample due to the limited prevalence of specific disorders. However, we did examine whether the *FAAH*  $\times$  *CRHR1* interaction was predictive of alcohol use disorder (i.e., DSM-IV alcohol abuse or dependence), or any Axis I disorder and found no support; alcohol use disorder ( $b = -.516$ ,  $p = .427$ ), any Axis I disorder ( $b = -0.134$ ,  $p = .802$ ).
